# Supplementary material for: Autoregulation of greA Expression Relies on GraL Rather than on greA Promoter Region
Source: MDPI journal article supplement (doi:10.3390/ijms20205224), 2019-10-22
Supplement: s1 [file s1]

# Autoregulation of *greA* Expression Relies on GraL Rather than on *greA* Promoter Region

Maciej Dylewski, Llorenç Fernández-Coll, Bożena Bruhn-Olszewska, Carlos Balsalobre and Katarzyna Potrykus

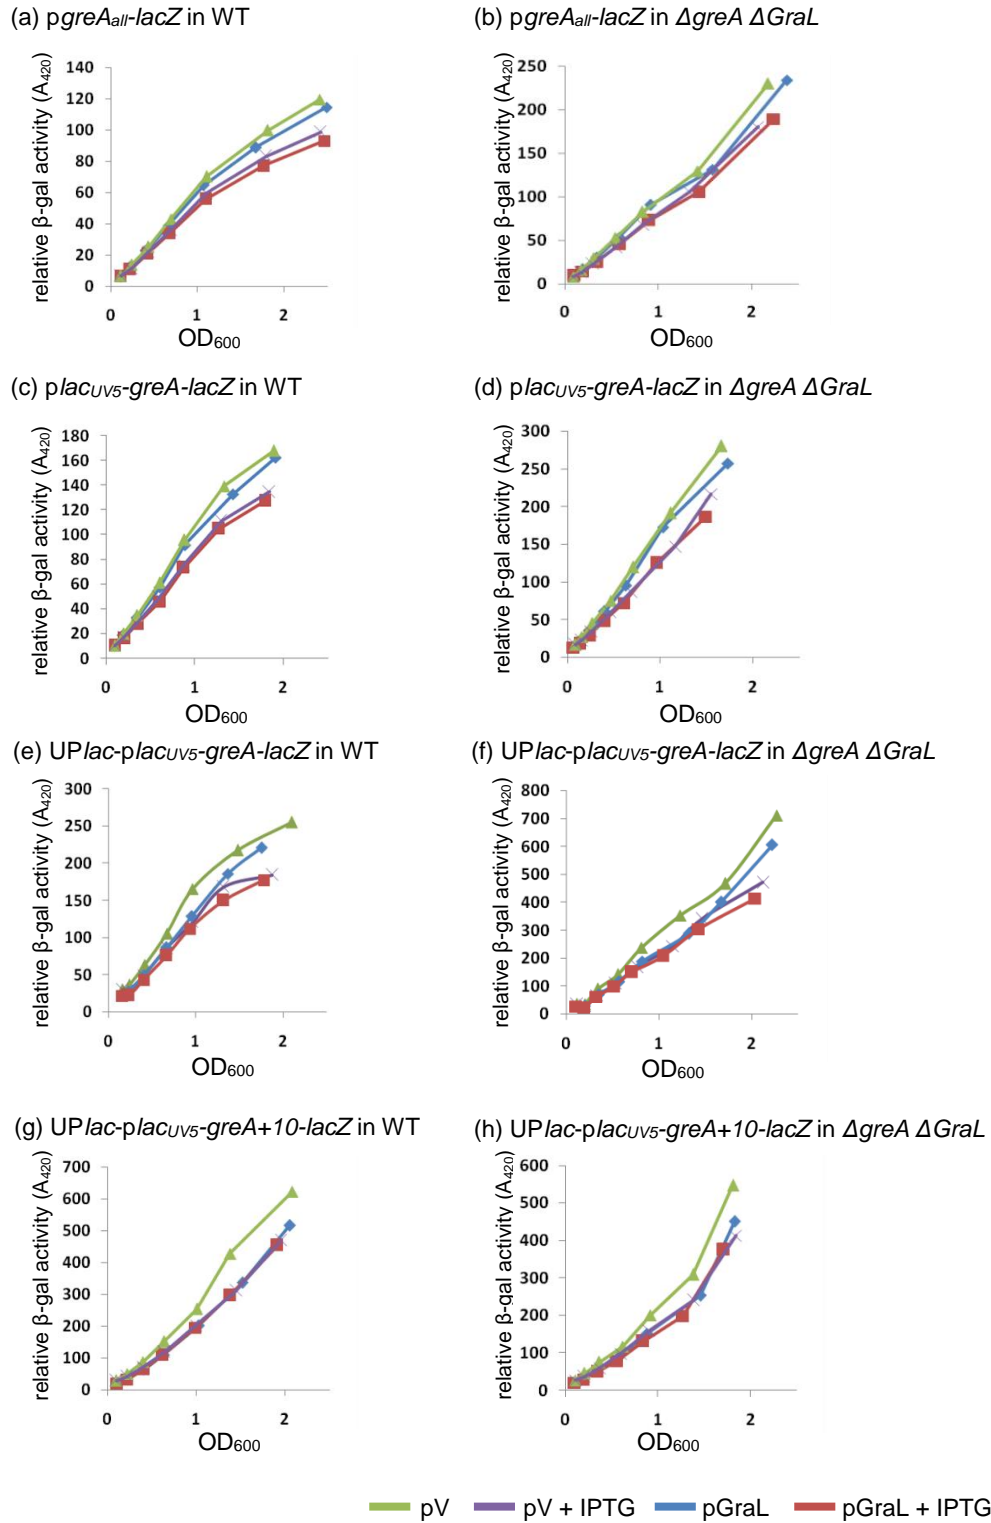

**Figure S1.** GraL does not affect *greA* expression when supplied *in trans*. Differential plots of beta-galactosidase activity of four *greA*-promoter/leader region fusions with *lacZ* vs  $OD_{600}$ , in the presence

or absence of GraL overproduced from a multicopy plasmid (pGraL; a pGB2 derivative). When present, IPTG was added to 1 mM at OD<sub>600</sub>~0.1. (a), (c), (e) and (g) – wt ( $\Delta lacZ$ ) (CF15617) strains were used; (b), (d), (f) and (h) -  $\Delta lacZ \Delta greA \Delta GraL$  (ECMZ1604) strains were used. pV- vector control (pHM1883). Experiments were done with one biological replicate and 6-10 technical replicates; calculated specific activities are presented in Table S1.

**Table S1.** Calculated  $\beta$  -galactosidase specific activity for the four *greA-lacZ* fusions in strains overproducing GraL from a multicopy plasmid (pGraL). pV – vector control. Average values were calculated from plots presented in Figure S1, based on at least 3 points where the  $\beta$  -galactosidase activity values were roughly linear. S.D. is given in parenthesis.

|                                   | <i>pgreA<sub>all</sub>-lacZ</i> | <i>plac<sub>UV5</sub>-greA-lacZ</i> | <i>UP<sub>lac</sub>-plac<sub>UV5</sub>-greA-lacZ</i> | <i>UP<sub>lac</sub>-Plac<sub>UV5</sub>-greA+10-lacZ</i> |
|-----------------------------------|---------------------------------|-------------------------------------|------------------------------------------------------|---------------------------------------------------------|
| WT strains                        |                                 |                                     |                                                      |                                                         |
| pV                                | 60.25 (+/- 3.33)                | 103.74 (+/- 3.52)                   | 155.65 (+/- 9.39)                                    | 226.39 (+/- 9.31)                                       |
| pV +IPTG                          | 50.74 (+/- 2.89)                | 84.38 (+/- 2.38)                    | 125.09 (+/- 3.01)                                    | 183.29 (+/- 4.69)                                       |
| pGraL                             | 57.37 (+/- 2.75)                | 97.07 (+/- 4.55)                    | 128.89 (+/- 6.75)                                    | 164.31 (+/- 8.10)                                       |
| pGraL+IPTG                        | 49.08 (+/- 3.00)                | 80.12 (+/- 3.14)                    | 110.20 (+/- 8.80)                                    | 160.85 (+/- 14.27)                                      |
| $\Delta graL \Delta greA$ strains |                                 |                                     |                                                      |                                                         |
| pV                                | 94.60 (+/- 3.51)                | 169.54 (+/- 5.16)                   | 275.89 (+/- 17.53)                                   | 210.95 (+/- 14.13)                                      |
| pV +IPTG                          | 77.33 (+/- 3.20)                | 132.62 (+/- 8.63)                   | 210.64 (+/- 7.65)                                    | 170.21 (+/- 6.85)                                       |
| pGraL                             | 89.49 (+/- 6.33)                | 158.76 (+/- 8.46)                   | 213.80 (+/- 13.42)                                   | 166.75 (+/- 8.16)                                       |
| pGraL+IPTG                        | 75.82 (+/- 3.19)                | 126.19 (+/- 6.60)                   | 199.76 (+/- 9.46)                                    | 150.89 (+/- 6.93)                                       |

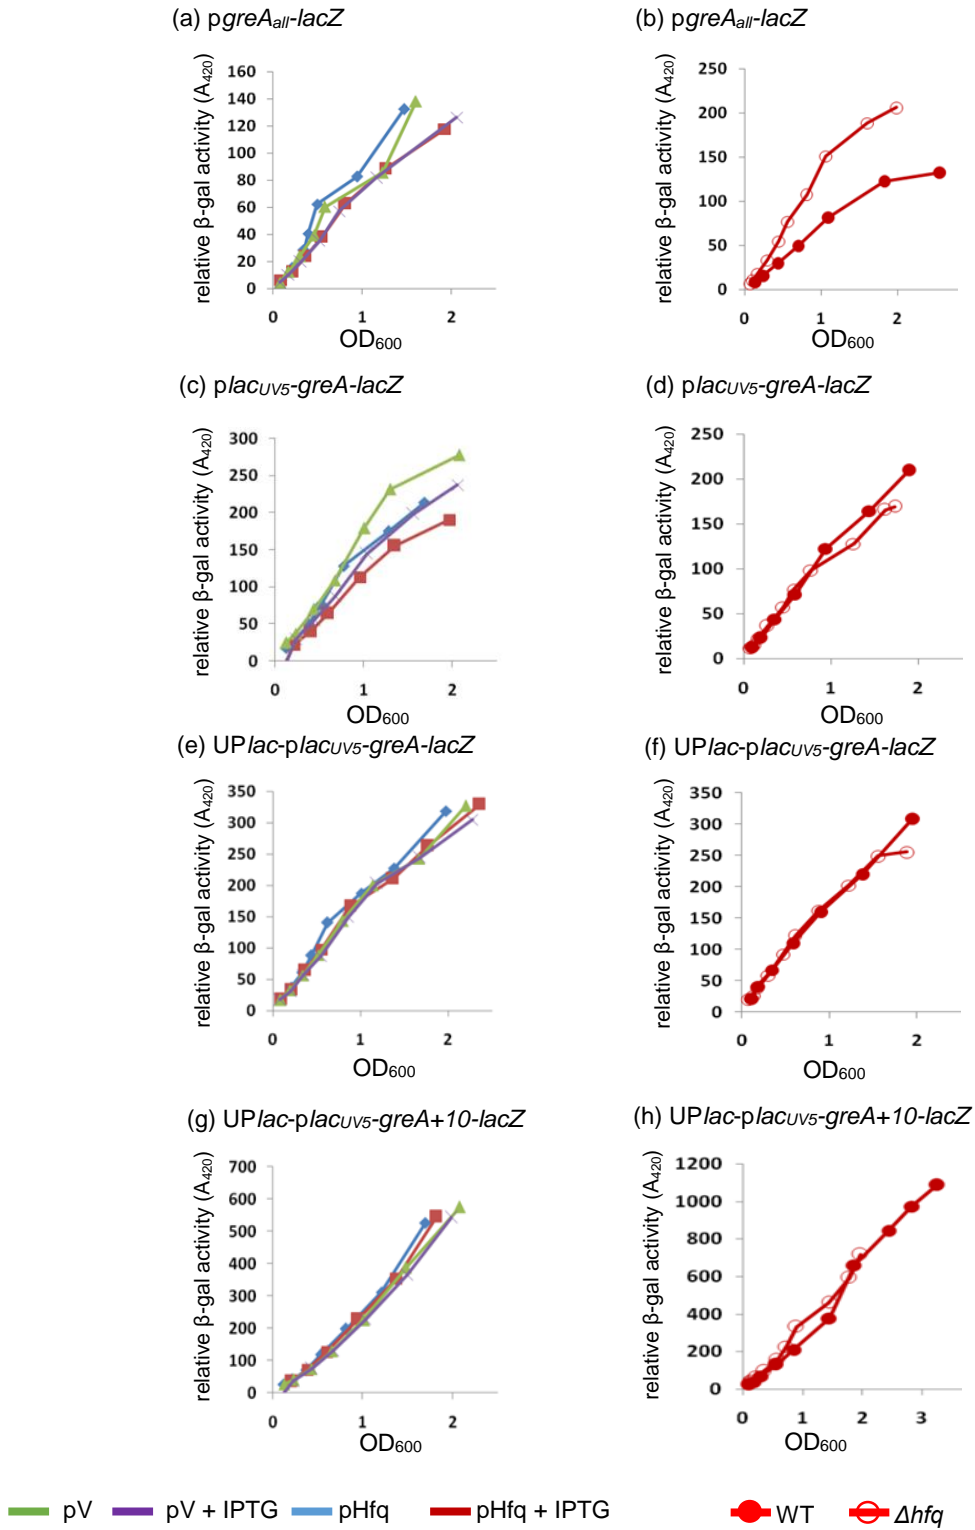

**Figure S2.** An *hfg* deletion de-represses the *pgreA<sub>all</sub>-lacZ* fusion's activity, but Hfq has no effect on other fusions where the promoter region has been replaced with *plac<sub>UV5</sub>*. Differential plots of  $\beta$ -galactosidase activity of four *greA*-promoter/leader region fusions with *lacZ* vs  $OD_{600}$ . Fusions used are indicated at the top of each panel. (a), (c), (e) and (g) in the presence or absence of Hfq overproduced from a multicopy plasmid (pHfq; an F+ derivative with *hfg* under a *ptac* promoter).

When present, IPTG was added to 1 mM at OD<sub>600</sub>~0.1; wt  $\Delta lacZ$  (CF15617) strains were used; pV- vector control (F+ *rpoB*). (b), (d), (f) and (h) – either wt  $\Delta lacZ$  or  $\Delta lacZ \Delta hfq$  strains were used. Experiments were done with one biological replicate and 6-10 technical replicates; calculated specific activities are presented in Table S2.

**Table S2.** Calculated  $\beta$ -galactosidase specific activity for the four *greA-lacZ* fusions in strains overproducing Hfq from a multicopy plasmid (pHfq) or in a  $\Delta hfq$  strain. pV – vector control. Average values were calculated from plots presented in Figure S2, based on at least 3 points where the  $\beta$ -galactosidase activity values were roughly linear. S.D. is given in parenthesis.

|              | <i>pgreA<sub>all</sub>-lacZ</i> | <i>plac<sub>UV5</sub>-greA-lacZ</i> | <i>UPlac-Plac<sub>UV5</sub>-greA-lacZ</i> | <i>UP<sub>lac</sub>-Plac<sub>UV5</sub>-greA+10-lacZ</i> |
|--------------|---------------------------------|-------------------------------------|-------------------------------------------|---------------------------------------------------------|
| pV           | 78.29 (+/- 7.49)                | 166.68 (+/- 10.47)                  | 143.83 (+/- 5.69)                         | 271.20 (+/- 8.58)                                       |
| pV +IPTG     | 69.59 (+/- 5.65)                | 128.88 (+/- 6.01)                   | 129.71 (+/- 3.91)                         | 259.83 (+/- 10.99)                                      |
| pHfq         | 83.89 (+/- 9.02)                | 135.40 (+/- 9.62)                   | 161.21 (+/- 2.65)                         | 240.27 (+/- 18.04)                                      |
| pHfq+IPTG    | 70.56 (+/- 5.24)                | 108.98 (+/- 7.51)                   | 147.43 (+/- 7.17)                         | 257.55 (+/- 5.55)                                       |
| WT           | 68.44 (+/- 2.18)                | 120.93 (+/- 6.92)                   | 186.16 (+/- 9.03)                         | 234.60 (+/- 9.53)                                       |
| $\Delta hfq$ | 106.69 (+/-5.02)                | 133.30 (+/- 5.12)                   | 196.73 (+/- 3.44)                         | 283.66 (+/- 14.11)                                      |

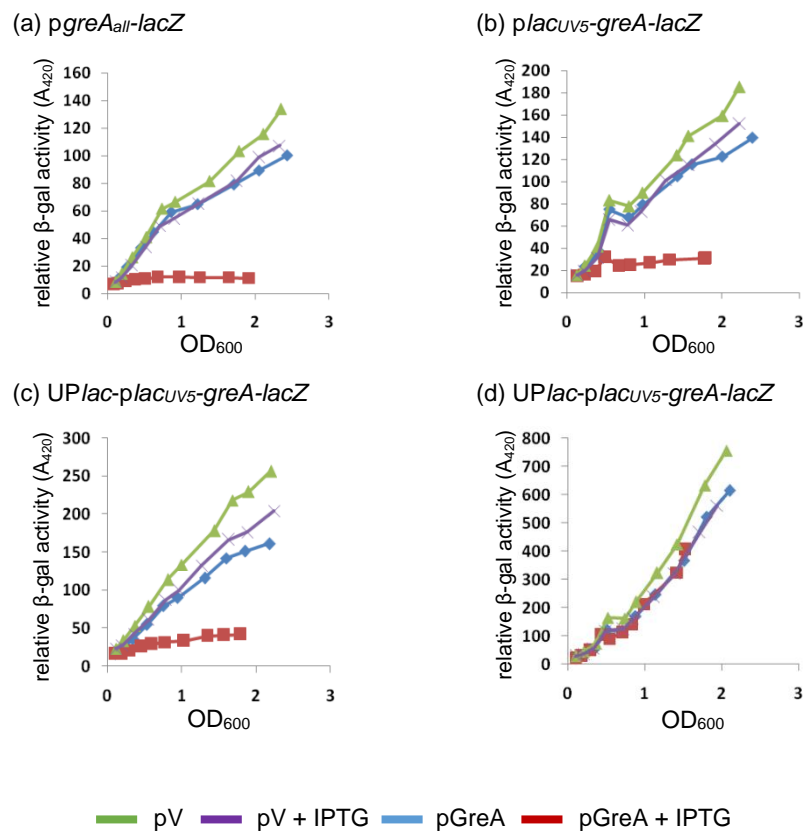

**Figure S3.** An *hfq* deletion does not alter GreA mediated regulation of *greA* expression. Differential plots of  $\beta$ -galactosidase activity of four *greA*-promoter/leader region fusions with *lacZ* vs  $OD_{600}$ , in the presence or absence of GreA overproduced from a multicopy plasmid (pGreA). (a) *pgreA<sub>all</sub>-lacZ*; (b) *plac<sub>UV5</sub>-greA-lacZ*; (c) *UP-plac<sub>UV5</sub>-greA-lacZ*; (d) *UP-plac<sub>UV5</sub>-greA+10-lacZ* fusions. When present, IPTG was added to 1 mM at  $OD_{600}$ ~0.1;  $\Delta lacZ \Delta hfq$  strains were used; pV- vector control. Experiments were done with one biological replicate and 6-10 technical replicates; calculated specific activities are presented in Table S3.

**Table S3.** Calculated  $\beta$ -galactosidase specific activity for the four *greA-lacZ* fusions in  $\Delta hfq$  strains overproducing GreA from a multicopy plasmid (pGreA). pV – vector control. Average values were

calculated from plots presented in Figure S3, based on at least 3 points where the  $\beta$ -galactosidase activity values were roughly linear. S.D. is given in parenthesis.

|            | <i>pgreA<sub>all</sub>-lacZ</i> | <i>plac<sub>UV5</sub>-greA-lacZ</i> | <i>UPlac-Plac<sub>UV5</sub>-greA-lacZ</i> | <i>UP<sub>lac</sub>-Plac<sub>UV5</sub>-greA+10-lacZ</i> |
|------------|---------------------------------|-------------------------------------|-------------------------------------------|---------------------------------------------------------|
| pV         | 68.41 (+/- 12.24)               | 92.57 (+/- 4.44)                    | 131.92 (+/- 6.86)                         | 248.16 (+/- 30.41)                                      |
| pV +IPTG   | 57.25 (+/- 9.40)                | 77.15 (+/- 2.52)                    | 105.28 (+/- 4.20)                         | 191.36 (+/- 20.02)                                      |
| pGreA      | 59.99 (+/- 12.30)               | 78.12 (+/- 6.54)                    | 94.43 (+/- 7.62)                          | 190.56 (+/- 25.44)                                      |
| pGreA+IPTG | 12.36*                          | 22.49*                              | 32.38*                                    | 164.21 (+/- 5.04)                                       |

\*  $\beta$ -galactosidase specific activity was calculated at OD<sub>600</sub>~1.0.

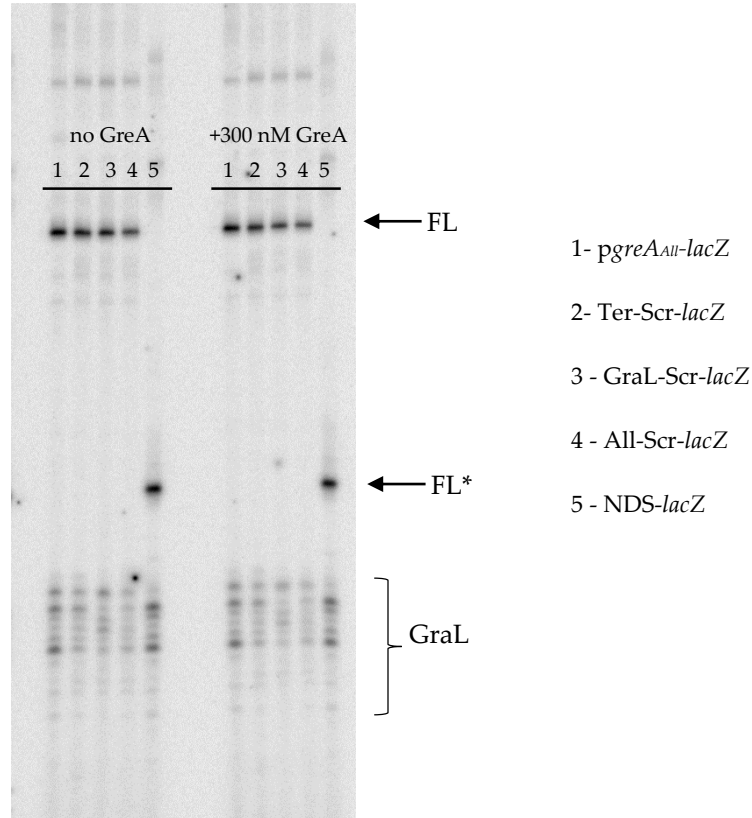

**Figure S4.** Constructs used for testing GraL leader/terminator region *in vivo* still undergo transcription termination *in vitro* regardless of absence or presence of GreA. Single round *in vitro* transcription was carried out on linear templates as described in the Materials and Methods section, in presence or absence of 300 nM GreA. FL indicates full-length runoff product formed; FL\* - full-length runoff product on the shortened (NDS-*lacZ*) template; GraL – short, prematurely terminated transcripts. Templates used are indicated (diagrams of the constructs used are presented in the left panels in Figure 3a and Figure 6a-d). Experiments were done thrice.

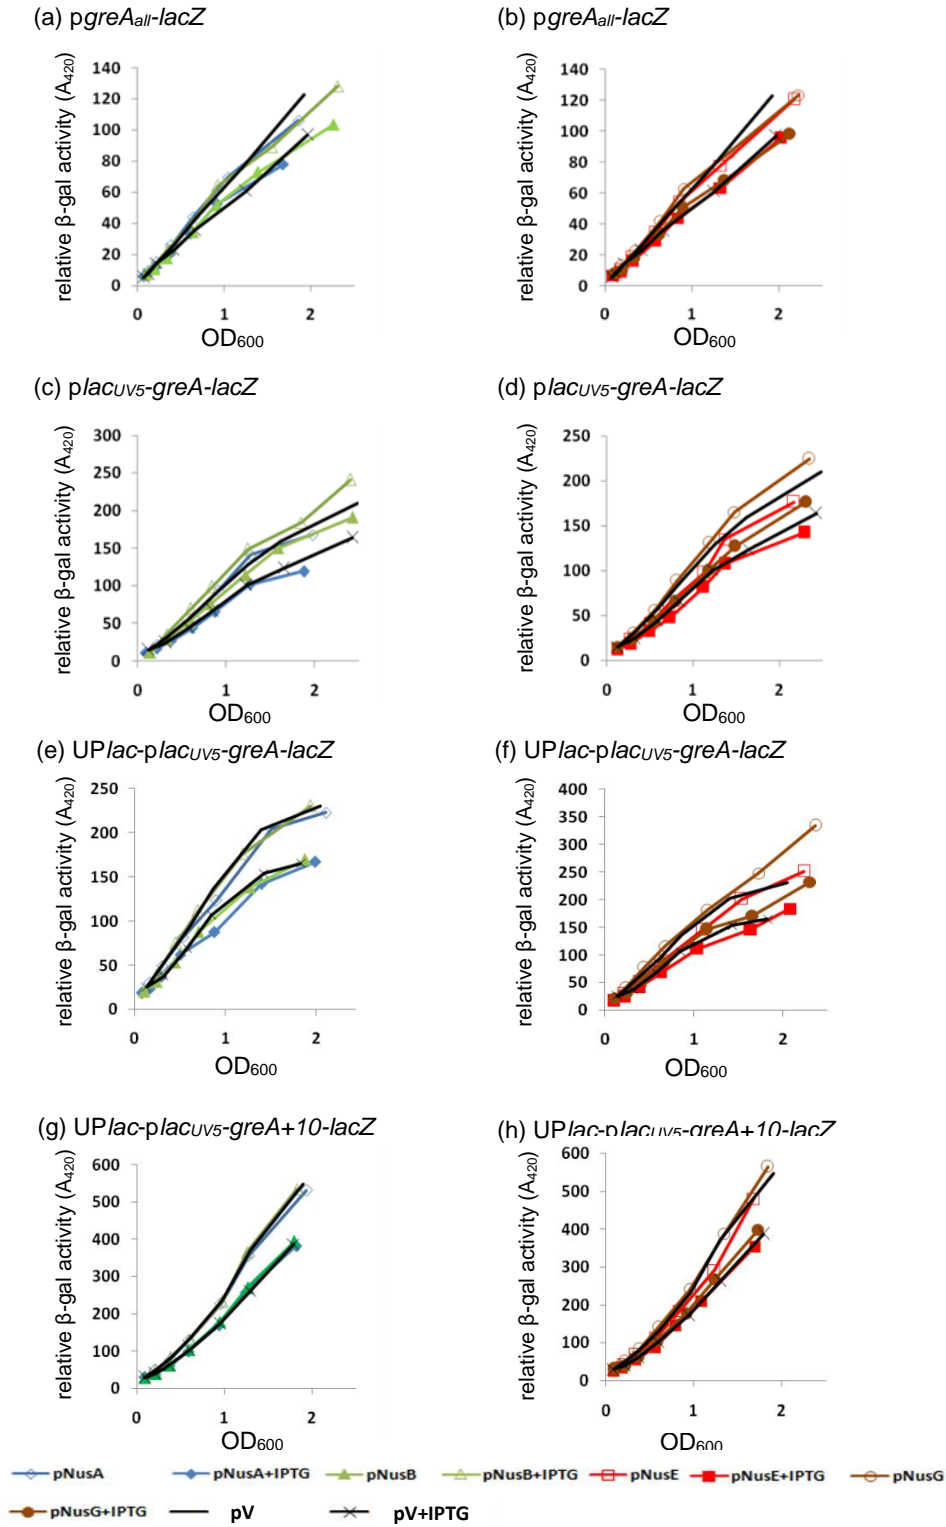

**Figure S5.** Nus factors do not alter *greA* expression. Differential plots of  $\beta$ -galactosidase activity of four *greA*-promoter/leader region fusions with *lacZ* vs  $OD_{600}$ , in the presence or absence of plasmids overproducing Nus factors. (a), (c), (e) and (g) – the effect of NusA or NusB was assessed; (b), (d), (f) and (h) – the effect of NusE or NusF was assessed. When present, IPTG was added to 1 mM at  $OD_{600} \sim 0.1$ ; wt  $\Delta lacZ$  (CF15617) strains were used; pV- vector control. Fusions used are indicated at the top of each panel. Experiments were done with one biological replicate and 6-10 technical replicates; calculated specific activities are presented in Table S4.

**Table S4.** Calculated  $\beta$ -galactosidase specific activity for the four *greA-lacZ* fusions in strains overproducing Nus factors (NusA, NusB, NusG or NusE) from a multicopy plasmid (pNusA, pNusB, pNusG or pNusE; pGB2 derivatives). pV – vector control (pHM1883). Average values were calculated from plots presented in Figure S5, based on at least 3 points where the  $\beta$ -galactosidase activity values were roughly linear. S.D. is given in parenthesis.

|            | <i>greA<sub>all</sub>-lacZ</i> | <i>Plac<sub>UV5</sub>-greA-lacZ</i> | <i>UP<sub>lac</sub>-Plac<sub>UV5</sub>-greA-lacZ</i> | <i>UP<sub>lac</sub>-Plac<sub>UV5</sub>-greA+10-lacZ</i> |
|------------|--------------------------------|-------------------------------------|------------------------------------------------------|---------------------------------------------------------|
| pV         | 65.70 (+/- 4.54)               | 99.47 (+/- 2.71)                    | 146.45 (+/- 20.09)                                   | 238.53 (+/- 28.90)                                      |
| pV+IPTG    | 57.71 (+/- 7.30)               | 77.78 (+/- 2.71)                    | 111.80 (+/- 13.58)                                   | 183.73 (+/- 14.04)                                      |
| pNusA      | 69.23 (+/- 3.41)               | 98.08 (+/- 8.20)                    | 153.29 (+/- 18.14)                                   | 234.34 (+/- 27.57)                                      |
| pNusA+IPTG | 57.93 (+/- 3.26)               | 74.91 (+/- 4.10)                    | 118.05 (+/- 17.40)                                   | 182.31 (+/- 17.11)                                      |
| pNusB      | 65.34 (+/- 4.90)               | 112.09 (+/- 8.33)                   | 150.08 (+/- 18.51)                                   | 239.36 (+/- 29.81)                                      |
| pNusB+IPTG | 54.59 (+/- 1.89)               | 91.34 (+/- 2.90)                    | 113.81 (+/- 15.03)                                   | 184.55 (+/- 17.96)                                      |
| pNusE      | 60.78 (+/- 1.92)               | 87.41 (+/- 6.96)                    | 136.56 (+/- 5.68)                                    | 219.10 (+/- 14.86)                                      |
| pNusE+IPTG | 51.30 (+/- 1.97)               | 70.76 (+/- 5.26)                    | 104.88 (+/- 8.98)                                    | 176.34 (+/- 14.02)                                      |
| pNusG      | 66.18 (+/- 3.54)               | 106.43 (+/- 5.62)                   | 164.05 (+/- 13.54)                                   | 247.76 (+/- 25.71)                                      |
| pNusG+IPTG | 54.91 (+/- 3.16)               | 83.01 (+/- 2.51)                    | 124.96 (+/- 12.55)                                   | 190.84 (+/- 16.21)                                      |

(a) *pgreA<sub>all</sub>-lacZ*

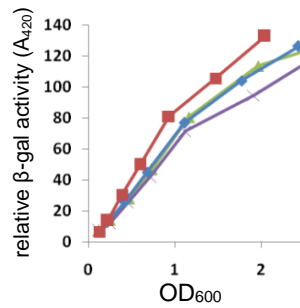

(b) *plac<sub>UV5</sub>-greA-lacZ*

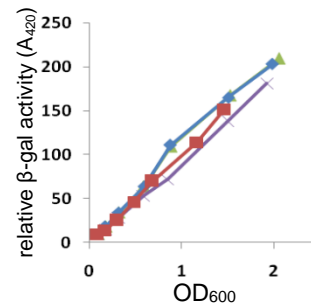

(c) *UP<sub>lac</sub>-plac<sub>UV5</sub>-greA-lacZ*

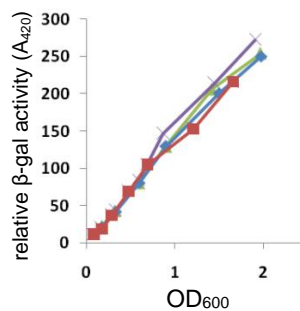

(d) *UP<sub>lac</sub>-plac<sub>UV5</sub>-greA-lacZ*

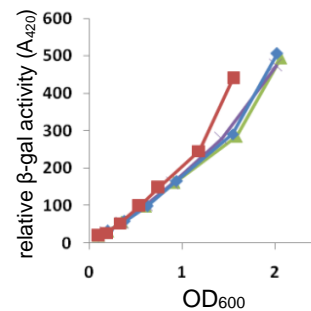

— pV — pV + IPTG — pBAI66 — pBAI66 + IPTG

**Figure S6.**  $\sigma^E$  induction has a moderate effect on the *greA* P2 promoter but has no effect on transcription proceeding through the *greA* leader region. Differential plots of  $\beta$ -galactosidase activity of four *greA*-promoter/leader region fusions with *lacZ* vs  $OD_{600}$ , in the presence or absence of a misfolded peptide accumulation; the YYF peptide was overproduced from a multicopy plasmid (pBAI66). (a) *pgreA<sub>all</sub>-lacZ*; (b) *plac<sub>UV5</sub>-greA-lacZ*; (c) *UP<sub>lac</sub>-plac<sub>UV5</sub>-greA-lacZ*; (d) *UP<sub>lac</sub>-plac<sub>UV5</sub>-greA+10-lacZ* fusions. When present, IPTG was added to 1 mM at  $OD_{600} \sim 0.1$ ; wt  $\Delta lacZ$  (CF15617) strains were used; pV- vector control (pTrc99). Experiments were done with one biological replicate and 6-10 technical replicates; calculated specific activities are presented in Table S5.

**Table S5.** Calculated  $\beta$ -galactosidase specific activity for the four *greA-lacZ* fusions in strains overproducing a misfolded YYF peptide, whose accumulation induces  $\sigma^E$  activity (pBAI66 plasmid, a pTrc99 derivative). pV – vector control (pTrc99). Average values were calculated from plots presented in Figure S6, based on at least 3 points where the  $\beta$ -galactosidase activity values were roughly linear. S.D. is given in parenthesis.

|             | <i>greA<sub>all</sub>-lacZ</i> | <i>Plac<sub>UV5</sub>-greA-lacZ</i> | <i>UP<sub>lac</sub>-Plac<sub>UV5</sub>-greA-lacZ</i> | <i>UP<sub>lac</sub>-Plac<sub>UV5</sub>-greA+10- lacZ</i> |
|-------------|--------------------------------|-------------------------------------|------------------------------------------------------|----------------------------------------------------------|
| pV          | 60.51 (+/- 2.85)               | 106.51 (+/- 3.96)                   | 131.69 (+/- 2.55)                                    | 162.29 (+/- 0.87)                                        |
| pV+IPTG     | 54.01 (+/- 5.36)               | 89.80 (+/- 2.11)                    | 131.53 (+/- 11.07)                                   | 158.19 (+/- 6.89)                                        |
| pBAI66      | 61.46 (+/- 4.51)               | 108.03 (+/- 1.05)                   | 128.56 (+/- 5.90)                                    | 161.60 (+/- 6.25)                                        |
| pBAI66+IPTG | 74.36 (+/- 11.14)              | 89.04 (+/- 6.89)                    | 128.11 (+/- 18.15)                                   | 166.08 (+/- 18.54)                                       |

**Table S6.** Strains used in this work.

| Strain   | Genotype                                                                                                                                                                                           | Source                |
|----------|----------------------------------------------------------------------------------------------------------------------------------------------------------------------------------------------------|-----------------------|
| MG1655   | F <sup>-</sup> , <i>ilvG</i> , <i>rph1</i>                                                                                                                                                         | Jin and Gross, 1988   |
| AAG1     | MG1655 $\Delta$ <i>lacZ</i>                                                                                                                                                                        | Aberg et al. 2008     |
| CF15617  | MG1655 $\Delta$ <i>lacZ</i>                                                                                                                                                                        | Vinella et al., 2012  |
| ECMZ1601 | CF15617 $\Delta$ <i>greA::cat</i>                                                                                                                                                                  | Dylewski et al., 2018 |
| ECMZ1604 | CF15617 $\Delta$ <i>GraL</i> $\Delta$ <i>greA::cat</i>                                                                                                                                             | Dylewski et al., 2018 |
| JW4130-1 | F <sup>-</sup> , $\Delta$ ( <i>araD-araB</i> )567, $\Delta$ <i>lacZ</i> 4787(::rrnB-3), $\lambda$ , <i>rph-1</i> , $\Delta$ ( <i>rhaD-rhaB</i> )568, $\Delta$ <i>hfq-722::kan</i> , <i>hsdR514</i> | Baba et al., 2006     |
| KP517    | CF15617 ( $\lambda$ <i>greA<sub>all</sub>-lacZ</i> )                                                                                                                                               | This work             |
| KP623    | CF15617( $\lambda$ <i>plac<sub>UV5</sub>-greA-lacZ</i> )                                                                                                                                           | This work             |
| KP625    | CF15617 ( $\lambda$ <i>UP<sub>lac</sub>-plac<sub>UV5</sub>-greA-lacZ</i> )                                                                                                                         | This work             |
| LFC3     | AAG1 ( $\lambda$ <i>greA -1030 to +175-lacZ</i> )                                                                                                                                                  | This study            |
| LFC4     | AAG1 <i>greA::Cm</i> ( $\lambda$ <i>greA -1030 to +175-lacZ</i> )                                                                                                                                  | This study            |
| MD324    | CF15617 ( $\lambda$ <i>UP<sub>lac</sub>-Plac<sub>UV5</sub>-greA+10- lacZ</i> )                                                                                                                     | This work             |
| MD404    | KP517 $\Delta$ <i>hfq-722::kan</i>                                                                                                                                                                 | This work             |
| MD405    | KP625 $\Delta$ <i>hfq-722::kan</i>                                                                                                                                                                 | This work             |
| MD406    | KP623 $\Delta$ <i>hfq-722::kan</i>                                                                                                                                                                 | This work             |
| MD407    | MD324 $\Delta$ <i>hfq-722::kan</i>                                                                                                                                                                 | This work             |
| MD441    | CF15617 ( $\lambda$ <i>NDS-lacZ</i> )                                                                                                                                                              | This work             |
| MD442    | CF15617 ( $\lambda$ <i>GraL-Scr-lacZ</i> )                                                                                                                                                         | This work             |
| MD443    | CF15617 ( $\lambda$ <i>Ter-Scr-lacZ</i> )                                                                                                                                                          | This work             |
| MD444    | CF15617 ( $\lambda$ <i>All-Scr-lacZ</i> )                                                                                                                                                          | This work             |
| MD474    | KP517 $\Delta$ <i>graL</i> $\Delta$ <i>greA::cat</i>                                                                                                                                               | This work             |
| MD475    | KP623 $\Delta$ <i>graL</i> $\Delta$ <i>greA::cat</i>                                                                                                                                               | This work             |
| MD476    | MD324 $\Delta$ <i>graL</i> $\Delta$ <i>greA::cat</i>                                                                                                                                               | This work             |
| TP1204   | MG1655 <i>greA</i> D41A                                                                                                                                                                            | Poteete, 2011         |

**Table S7.** Plasmids used in this work.

| Plasmid         | Description                                                                    | Source                 |
|-----------------|--------------------------------------------------------------------------------|------------------------|
| pBR322          | <i>ori</i> pMB1, Ap <sup>R</sup> , Tc <sup>R</sup>                             | Bolivar et al., 1977   |
| pBR-greA        | <i>greA</i> with native promoter cloned into pBR322                            | This work              |
| pBR-greA D41A   | <i>greA</i> D41A with native promoter cloned into pBR322                       | This Work              |
| pHM1786         | pGB2 derivative, <i>ori</i> pSC101, <i>lacI<sup>q</sup></i> , Spc <sup>R</sup> | [Vinella et al., 2012] |
| pGraL           | <i>GraL</i> under <i>ptac</i> promoter cloned into pHM1786                     | This work              |
| pGreA (pHM1873) | <i>greA</i> under <i>ptac</i> promoter cloned into pHM1786                     | [Vinella et al., 2012] |
| pV (pHM1883)    | Vector control for pGreA and pGraL                                             | [Vinella et al., 2012] |



|                                                           |                                                                                                                                                                                                  |                         |
|-----------------------------------------------------------|--------------------------------------------------------------------------------------------------------------------------------------------------------------------------------------------------|-------------------------|
| pRS415                                                    | For construction of transcriptional fusions with <i>lacZ</i> and subsequent transfer to $\lambda$ and recombination on the chromosome; Ap <sup>R</sup>                                           | [Simons et al., 1987]   |
| pRS551                                                    | pRS415 derivative, Ap <sup>R</sup> Kan <sup>R</sup>                                                                                                                                              | [Simons et al., 1987]   |
| pKP-pAall                                                 | Region spanning -100 to +136 (relative to +1 of <i>pgreA</i> P1 promoter) fused to <i>lacZ</i> in pRS415 at the <i>Bam</i> HI/ <i>Hind</i> III sites                                             | [Potrykus et al., 2010] |
| pKP- plac <sub>UV5</sub> -greA-lacZ                       | The same as pKP-pAall but promoter region replaced by plac <sub>UV5</sub>                                                                                                                        | This work               |
| pKP- UP <sub>lac</sub> -plac <sub>UV5</sub> -greA-lacZ    | The same as pKP- plac <sub>UV5</sub> -greA-lacZ but UP region replaced by region upstream of the native plac promoter; CRP binding site mutated (G->A at position -66, and C->T at position -55) | This work               |
| pMD- UP <sub>lac</sub> -Plac <sub>UV5</sub> -greA+10-lacZ | The same as pKP- UP <sub>lac</sub> -plac <sub>UV5</sub> -greA-lacZ, but the region from +10 to +136 deleted                                                                                      | This work               |
| pMD-GraL_Scr-lacZ                                         | The same as pKP-pAall but the sequence from +1 to +18 randomly scrambled                                                                                                                         | This work               |
| pMD- Ter_Scr-lacZ                                         | The same as pKP-pAall but the sequence from +19 to +48 scrambled so as to switch the terminator hairpin arms with each other                                                                     | This work               |
| pMD- pAll_Scr-lacZ                                        | The same as pMD- Ter_Scr but also with the sequence from +1 to +18 scrambled                                                                                                                     | This work               |
| pMD-NDS-lacZ                                              | The same as pKP-pAall but the region from +60 to +134 deleted                                                                                                                                    | This work               |
| pTrc99A                                                   | Vector, pBR322 ori, Ap <sup>R</sup>                                                                                                                                                              | [Amann et al., 1988]    |
| pBAI66                                                    | Plasmid for overproduction of a misfolded peptide (YYF) to induce $\sigma^E$ ; pTrc99A derivative                                                                                                | [Walsh et al., 2003]    |
| pNusA                                                     | <i>nusA</i> cloned into pGB2                                                                                                                                                                     | [Friedman et al., 1990] |
| pNusB                                                     | <i>nusB</i> cloned into pGB2                                                                                                                                                                     | [Friedman et al., 1990] |
| pNusE                                                     | <i>nusE</i> cloned into pGB2                                                                                                                                                                     | [Friedman et al., 1990] |
| pNusG                                                     | <i>nusG</i> cloned into pGB2                                                                                                                                                                     | [Friedman et al., 1990] |
| F+rpoB                                                    | <i>rpoB</i> under <i>ptac</i> promoter in an F+ plasmid                                                                                                                                          | [Saka et al., 2005]     |
| F+hfq                                                     | <i>hfq</i> under <i>ptac</i> promoter in an F+ plasmid                                                                                                                                           | [Saka et al., 2005]     |

**Table S8.** Oligonucleotides and synthetic DNA fragments used in this work.

| Name                 | Sequence (5'-3')           | Description                                                                                                                           |
|----------------------|----------------------------|---------------------------------------------------------------------------------------------------------------------------------------|
| Oligonucleotides     |                            |                                                                                                                                       |
| pBplasd <sub>w</sub> | CTTTCATCGGTTGTCCGATCC      | For <i>in vitro</i> transcription template preparation, based on [Potrykus et al., 2010]                                              |
| G1                   | GAGAATTCGCGATCATGTTGTCCGAC | For construction of pBR-GreA and pBR-GreA D41A plasmids, and construction of $\lambda$ <i>greA</i> - 1030 to +175- <i>lacZ</i> fusion |

|                                                                                                                                       |                                                                                                                                                                                                                                                                          |                                                                                                                                                                                              |
|---------------------------------------------------------------------------------------------------------------------------------------|--------------------------------------------------------------------------------------------------------------------------------------------------------------------------------------------------------------------------------------------------------------------------|----------------------------------------------------------------------------------------------------------------------------------------------------------------------------------------------|
| <b>G7</b>                                                                                                                             | CAGGATCCCGTAAGGTCATCGGAATAGC                                                                                                                                                                                                                                             | For construction of $\lambda$ <i>greA</i> -1030 to +175- <i>lacZ</i> fusion                                                                                                                  |
| <b>G11</b>                                                                                                                            | CACTGCAGCAACATCTTGAGTATTGGG                                                                                                                                                                                                                                              | For construction of pBR-GreA and pBR-GreA D41A plasmids                                                                                                                                      |
| <b>HMP<sub>r</sub>368</b>                                                                                                             | CAGGAATTGGGGATCGGAATTC                                                                                                                                                                                                                                                   | For <i>in vitro</i> transcription template preparation, based on [Potrykus et al., 2010]                                                                                                     |
| <b>KPr77</b>                                                                                                                          | TATGAATTCGGAAAGCGGGCAGTGAGCGCAACGCAATTAATGTAAGTTAGCTCATTATTAGGCACCCCAGGCTTTACACTTTATGCTT                                                                                                                                                                                 | Forward primer to make the $UP_{lac}$ - $Plac_{UV5}$ - <i>greA</i> +10- <i>lacZ</i> fusion (with pKP- $UP_{lac}$ - $plac_{UV5}$ - <i>greA</i> - <i>lacZ</i> as template in the PCR reaction) |
| <b>KPr78</b>                                                                                                                          | TCTGGATCCACATTTTGATCCACACAT TATACGAGCCGGAAGCATAAAGTGTA AAGCCTGGGGTGCCTAATGAATGAGC TAACTTACAT                                                                                                                                                                             | Reverse primer to make the $UP_{lac}$ - $Plac_{UV5}$ - <i>greA</i> +10- <i>lacZ</i> fusion (with pKP- $UP_{lac}$ - $plac_{UV5}$ - <i>greA</i> - <i>lacZ</i> as template in the PCR reaction) |
| <b>MDGLDWN</b>                                                                                                                        | ATCAAGCTTAAGCAAAAAAATACCGA CCCGGGTACAAGTCCCAGGTCAG                                                                                                                                                                                                                       | Reversed primer for GraL cloning (anneals to MDGLUP)                                                                                                                                         |
| <b>MDGLUP</b>                                                                                                                         | ATGAATTCATCAAAATGTGAATTGTA GCTGACCTGGGACTTGTACCCG                                                                                                                                                                                                                        | Forward primer for GraL cloning (anneals to MDGLDWN)                                                                                                                                         |
| <b>pAp2sRNA</b>                                                                                                                       | AAAATACCGACCGGGTACAAGTCCCA GGTGAGCTACAAT                                                                                                                                                                                                                                 | Probe for $P^{32}$ labeling; complementary to GraL (based on [Potrykus et al., 2010])                                                                                                        |
| <b>5SProbe</b>                                                                                                                        | Cy3-CATGGGGTCAGGTGGGACCACCGCGC TACGGCCGCCAGGC                                                                                                                                                                                                                            | Cy3-labeled probe to 5S RNA (based on [Moll et al., 2003])                                                                                                                                   |
| Synthetic DNA fragments [obtained through GeneStrings (GeneArt) service (Thermo)]<br><i>Bam</i> HI/ <i>Eco</i> RI sites are indicated |                                                                                                                                                                                                                                                                          |                                                                                                                                                                                              |
| <b><math>plac_{UV5}</math>-<i>greA</i></b>                                                                                            | TATGAATTCATAATCTCGCGCTAACAACCTGGAATCGAGCCGT CATACTACGGCGCAACGCCCTATAAAGTAAACGTTTACACTTT ATGCTTCCGGCTCGTATAATGGTGGATCAAAATGTGAATTGTAG CTGACCTGGGACTTGTACCCGGGTCGGTATTTTTTTTGCTTCTGGT CCCGGTAAGGAGTTATGCCGGGCAGGCCGAACAGCCGGGGGTG GGTGAAGACTTGCCCTATCAGGAATATTCAAGGATCCAGA |                                                                                                                                                                                              |
| <b><math>UP_{lac}</math>-<math>plac_{UV5}</math>-<i>greA</i></b>                                                                      | TATGAATTCGGAAAGCGGGCAGTGAGCGCAACGCAATTAATGT AAGTTAGCTCATTATTAGGCACCCCAGGCTTTACACTTTATGC TTCCGGCTCGTATAATGTGTGGATCAAAATGTGAATTGTAGCTG ACCTGGGACTTGTACCCGGGTCGGTATTTTTTTTGCTTCTGGTCCC GGTAAAGGAGTTATGCCGGGCAGGCCGAACAGCCGGGGGGGTG AAGACTTGCCCTATCAGGAATATTCAAGGATCCAGA     |                                                                                                                                                                                              |
| <b>NDS_</b>                                                                                                                           | TATGAATTCATAATCTCGCGCTAACAACCTGGAATCGAGCCG TCATACTACGGCGCAACGCCCTATAAAGTAAACGATGACCCTT CGGGAAGTTTCAAGGGTAAATGACTATCAAAATGTGAATTGTAG                                                                                                                                      |                                                                                                                                                                                              |

|          |                                                                                                                                                                                                                                                                                     |
|----------|-------------------------------------------------------------------------------------------------------------------------------------------------------------------------------------------------------------------------------------------------------------------------------------|
|          | CTGACCTGGGACTTGTACCCGGGTCGGTATTTTTTTGCTTGGATC<br>CAGA                                                                                                                                                                                                                               |
| GraL_Scr | TATGAATTCATAATCTCGCGCTAACAACTGGAATCGAGCCG<br>TCATACTACGGCGCAACGCCCTATAAAGTAAACGATGACCCTT<br>CGGGAAC TTCAGGGTAAAATGACTATAAGATATATGTACTAGG<br>CTGACCTGGGACTTGTACCCGGGTCGGTATTTTTTTGCTTCTGGT<br>CCCGGTAAGGAGTTATGCCGGGCAGGCCGAACAGCCGGGGTG<br>GGTGAAGACTTGCCCTATCAGGAATATTCAAGATCCAGA  |
| Ter_Scr  | TATGAATTCATAATCTCGCGCTAACAACTGGAATCGAGCCG<br>TCATACTACGGCGCAACGCCCTATAAAGTAAACGATGACCCTT<br>CGGGAAC TTCAGGGTAAAATGACTATCAAAATGTGAATTGTAT<br>GGCTGGGCCCATGTT CAGGGTCCAGTCGATTTTTTTGCTTCTGGT<br>CCCGGTAAGGAGTTATGCCGGGCAGGCCGAACAGCCGGGGTG<br>GGTGAAGACTTGCCCTATCAGGAATATTCAAGATCCAGA |
| All_Scr  | TATGAATTCATAATCTCGCGCTAACAACTGGAATCGAGCCG<br>TCATACTACGGCGCAACGCCCTATAAAGTAAACGATGACCCTT<br>CGGGAAC TTCAGGGTAAAATGACTATAAGATATATGTACTAGT<br>GGCTGGGCCCATGTT CAGGGTCCAGTCGATTTTTTTGCTTCTGGT<br>CCCGGTAAGGAGTTATGCCGGGCAGGCCGAACAGCCGGGGTG<br>GGTGAAGACTTGCCCTATCAGGAATATTCAAGATCCAGA |
